# Supplementary material for: Molecular wiring of chlorophyll a and cytochrome c on carbon black for amplified photocurrent generation and ROS profiling in cancer cells
Source: Royal Society of Chemistry journal article supplement (doi:10.1039/d5cp04355g), 2026-01-01
Supplement: d5cp04355g1.pdf [file d5cp04355g1.pdf]

# Supporting information

## Molecular Wiring of Chlorophyll a and Cytochrome c on Carbon Black for Amplified Photocurrent Generation and ROS Profiling in Cancer Cells

Jayaprakash Meena,<sup>a,b</sup> Sugumar Monisha,<sup>a,b</sup> Tamizhselvi Ramasamy,<sup>c</sup> Kandhan Palanisamy,<sup>d</sup>  
Varatharaj Rajapandian,<sup>e</sup> K. Santhakumar<sup>b\*</sup> and Annamalai Senthil Kumar <sup>a,b\*</sup>

<sup>a</sup>*Nano and Bioelectrochemistry Research Laboratory, CO<sub>2</sub> Research and Green Technologies Centre,  
Vellore Institute of Technology University, Vellore – 632 014, Tamil Nadu,*

<sup>b</sup>*Department of Chemistry, School of Advanced Sciences, Vellore Institute of Technology University,  
Vellore – 632 014, Tamil Nadu, India*

<sup>c</sup>*Department of Bioscience, School of Bio-Sciences and Technology, Vellore Institute of Technology,  
Vellore, Tamil Nadu 632014, India*

<sup>d</sup>*Department of Chemistry, SRM Institute of Science and Technology, Kattankulathur 603203, Tamil  
Nadu, India*

<sup>e</sup>*Department of Chemistry, Sri Ramakrishna Mission Vidyalaya College of Arts and Science, Coimbatore-  
641020, Tamil Nadu, India*

Corresponding Author's E-mails: askumarchem@yahoo.com & askumar@vit.ac.in (A.S. Kumar)  
and phone number; +91-416-2202754

| S.No | Item      | Caption                                                                                                                                                                                                                                                                                                                                                                                                                                                                                     | Page no. |
|------|-----------|---------------------------------------------------------------------------------------------------------------------------------------------------------------------------------------------------------------------------------------------------------------------------------------------------------------------------------------------------------------------------------------------------------------------------------------------------------------------------------------------|----------|
| 1    | Figure S1 | Figure S1. Effect of loading of various concentrations of Chla on GCE/CB (A) 10 (B) 20 (C) 30 (D) 40 and (E) 50mg of Chla in pH 7 PBS (N <sub>2</sub> purged) and (F) The plot of [Chla] vs $i_{pc}$ .                                                                                                                                                                                                                                                                                      | S3       |
| 2    | Figure S2 | Figure S2. (A) CV response of GCE modified CB@porphyrin and (B) CB/Cytc@porphyrin in pH 7 PBS (N <sub>2</sub> purged).                                                                                                                                                                                                                                                                                                                                                                      | S4       |
| 3    | Figure S3 | Figure S3. (A-B) The effect of scan rate (10-100 mV s <sup>-1</sup> ) of GCE/CB@Chla and GCE/CB@Cytc-Chla in blank pH 7 PBS solution (N <sub>2</sub> purged) in dark conditions and (C) Plot of $E_{pc}$ vs log( $v$ ).                                                                                                                                                                                                                                                                     | S5       |
| 4    | Figure S4 | Figure S4. AFM height calculation of (A) CB, (B) CB@Chla and (C) CB@Cytc-Chla.                                                                                                                                                                                                                                                                                                                                                                                                              | S6       |
| 5    | Figure S5 | Figure S5. The selected top 3 docking conformations of Chla and cytochrome <i>c</i> . A) dock1 B) dock2 and C) dock3.                                                                                                                                                                                                                                                                                                                                                                       | S7       |
| 6    | Figure S6 | Figure S6 (A) CV response of (a) GCE/CB@Chla and (b) GCE/CB@Cytc-Chla using 5mM Fe(CN) <sub>6</sub> <sup>3-</sup> containing N <sub>2</sub> purged 0.1M KCl solution and (B-C) Approach curves response of GCE/CB@Chla and GCE/CB@Cytc-Chla in 5mM Fe(CN) <sub>6</sub> <sup>3-</sup> containing N <sub>2</sub> purged 0.1M KCl solution.                                                                                                                                                    | S8       |
| 7    | Figure S7 | Figure S7. Photocurrent response was recorded in amp-it at -0.25V vs Ag/AgCl: (A) CB (a), CB/Cytc/BSA (b) and CB@Chla/BSA (c) modified electrodes in pH 7 PBS N <sub>2</sub> atm. (B) $i_p$ of modified electrodes and (C) CB@Cytc-Chla in different light intensities (10-50 mW cm <sup>-2</sup> ).                                                                                                                                                                                        | S9       |
| 8    | Figure S8 | Figure S8. (A-B) Effect of scan rate of GCE/CB@Chla and GCE/CB/Cytc in the presence of 20 $\mu$ M of H <sub>2</sub> O <sub>2</sub> in pH 7 PBS (N <sub>2</sub> purged). (C) plot of cathodic peak current $i_{pc}$ vs square root of $v$ . (D-E) Effect of concentration (5-40) $\mu$ M of H <sub>2</sub> O <sub>2</sub> of GCE/CB@Chla and GCE/CB/Cytc in pH 7 PBS (N <sub>2</sub> purged) and (F) plot of $ i_{pc} $ vs [H <sub>2</sub> O <sub>2</sub> ]/( $\mu$ M) (baseline corrected). | S10      |

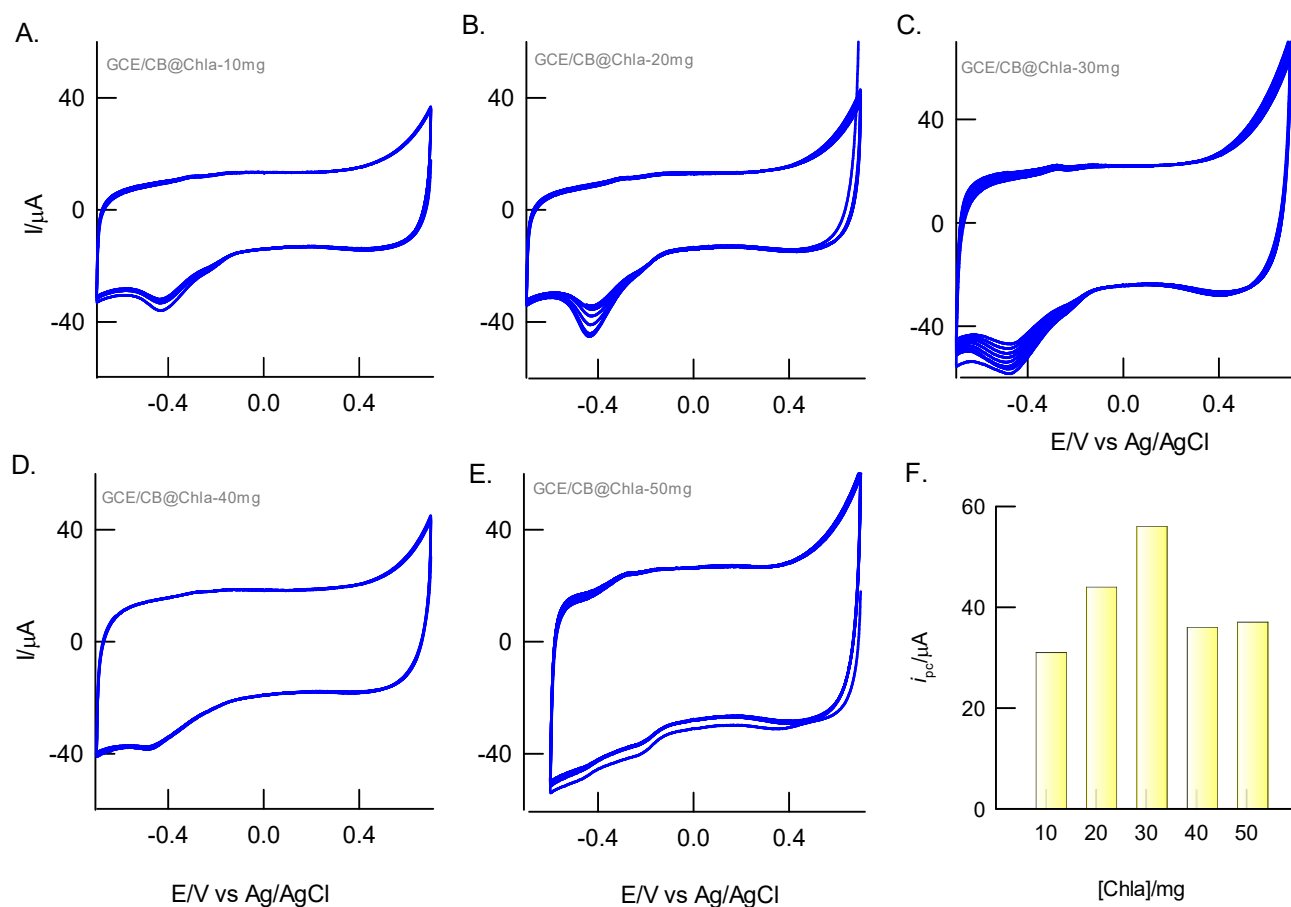

**Figure S1.** Effect of loading of various concentrations of Chla on GCE/CB (A) 10 (B) 20 (C) 30 (D) 40 and (E) 50mg of Chla in pH 7 PBS ( $\text{N}_2$  purged) and (F) The plot of  $|i_{pc}|$  vs  $[\text{Chla}]$ .  $i_{pc}$  – Baseline not corrected.

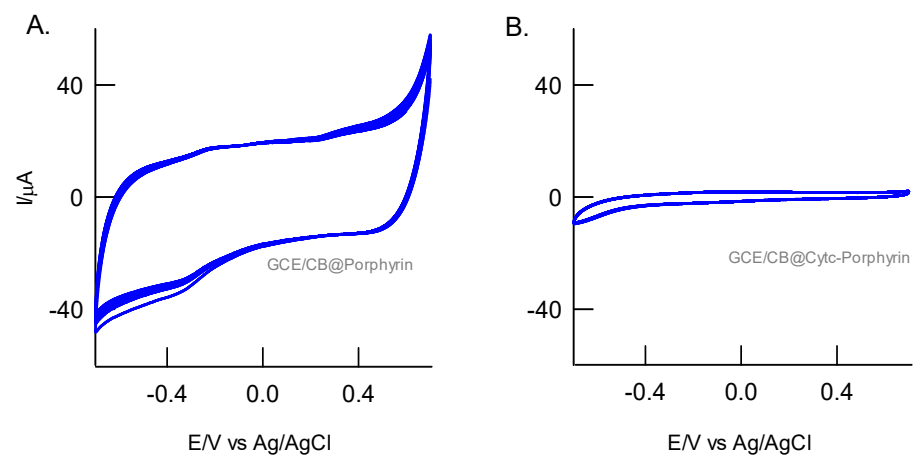

**Figure S2.** (A) CV response of GCE modified CB@porphyrin and (B) CB/CytC@porphyrin in pH 7 PBS ( $\text{N}_2$  purged).

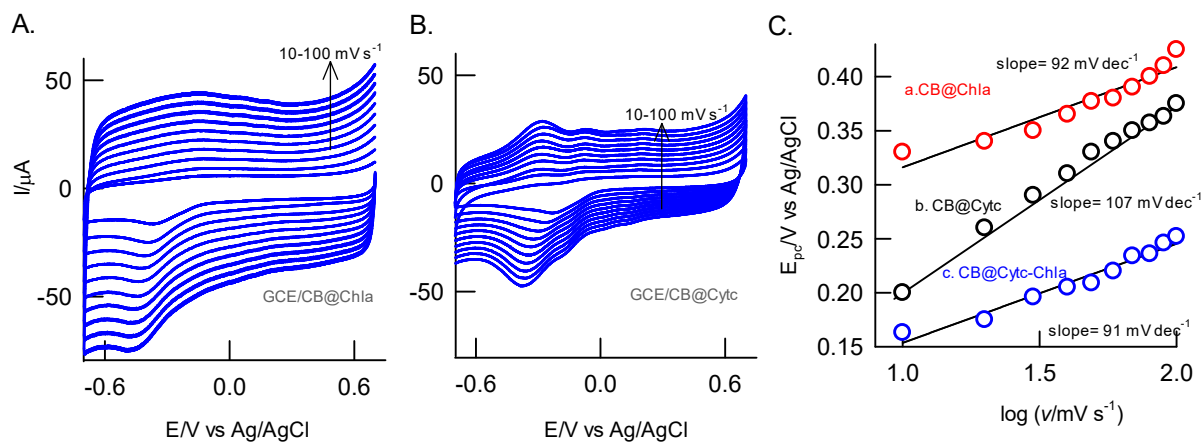

**Figure S3.** (A-B) The effect of scan rate (10-100 mV s<sup>-1</sup>) of GCE/CB@Chla and GCE/CB@CytC-Chla in blank pH 7 PBS solution (N<sub>2</sub> purged) in dark conditions and (C) Plot of E<sub>pc</sub> vs log(v).

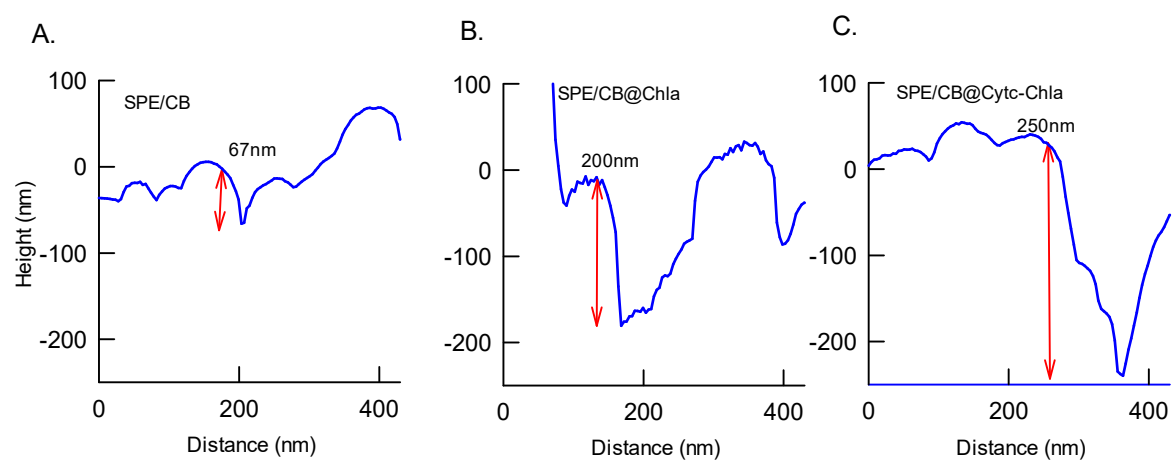

**Figure S4.** AFM height calculation of (A) CB, (B) CB@Chla and (C) CB@CytC-Chla.

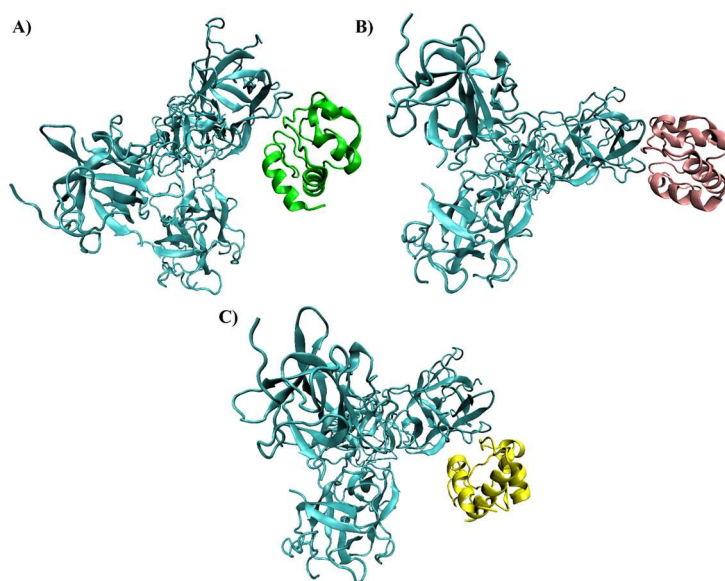

**Figure S5.** The selected top 3 docking conformations of Chla and cytochrome *c*. A) dock1 B) dock2 and C) dock3.

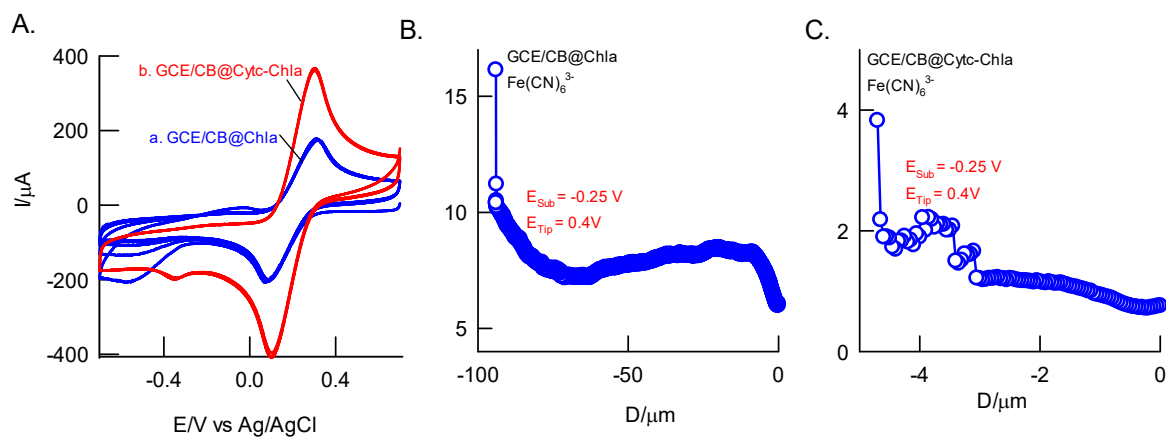

**Figure S6** (A) CV response of (a) GCE/CB@Chla and (b) GCE/CB@CytC-Chla using 5mM  $\text{Fe}(\text{CN})_6^{3-}$  containing  $\text{N}_2$  purged 0.1M KCl solution and (B-C) Approach curves response of GCE/CB@Chla and GCE/CB@CytC-Chla in 5mM  $\text{Fe}(\text{CN})_6^{3-}$  containing  $\text{N}_2$  purged 0.1M KCl solution.



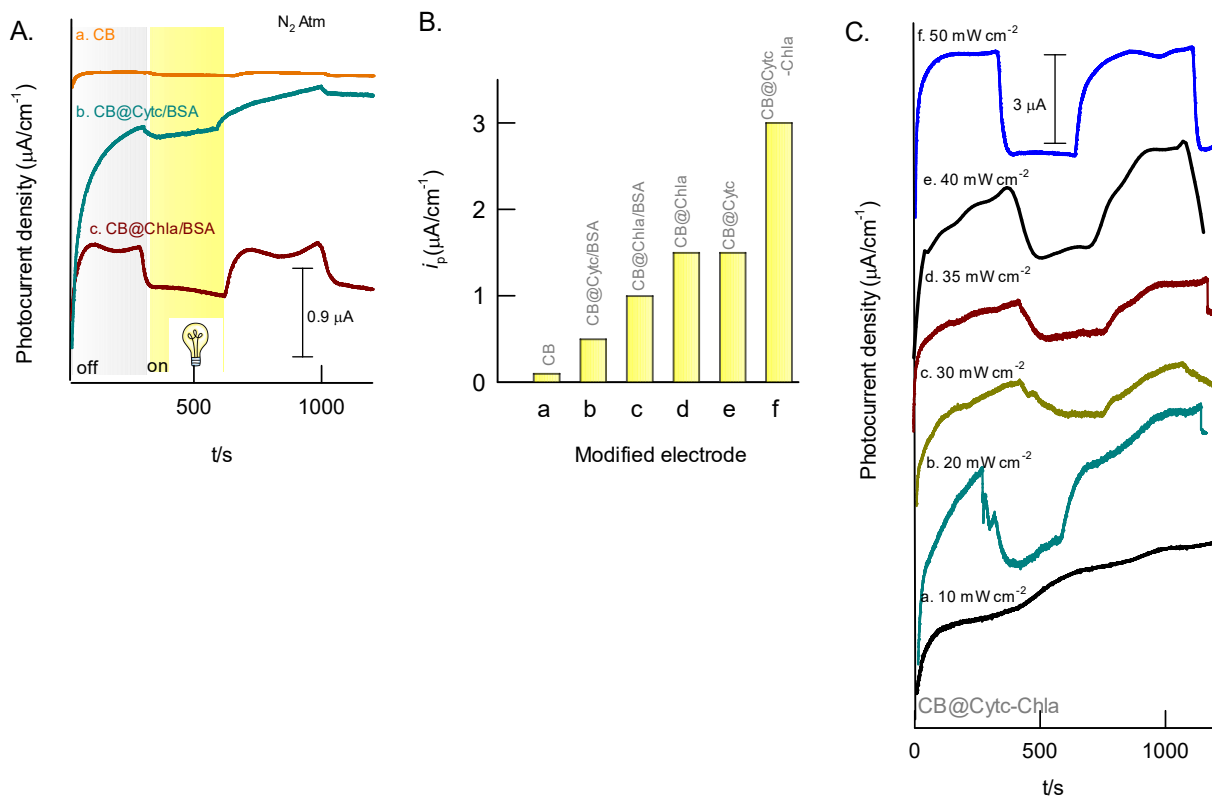

**Figure S7.** Photocurrent response was recorded in amp-it at  $-0.25\text{V}$  vs  $\text{Ag}/\text{AgCl}$ : (A) CB (a), CB/CytC/BSA (b) and CB@Chla/BSA (c) modified electrodes in pH 7 PBS  $\text{N}_2$  atm. (B)  $I_p$  of modified electrodes and (C) CB@CytC-Chla in different light intensities ( $10\text{--}50 \text{ mW cm}^{-2}$ ).

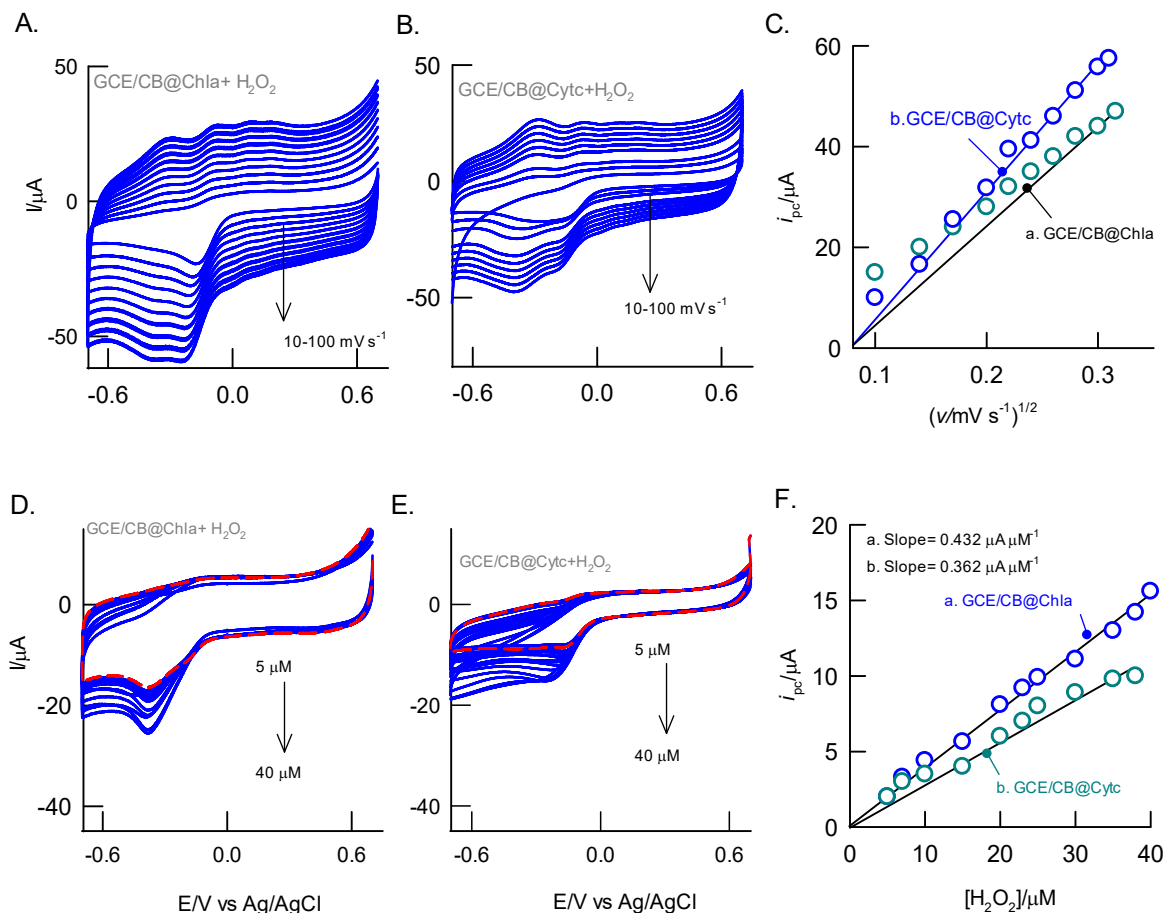

**Figure S8.** (A-B) Effect of scan rate of GCE/CB@Chla and GCE/CB/Cytc in the presence of 20 μM of H<sub>2</sub>O<sub>2</sub> in pH 7 PBS (N<sub>2</sub> purged). (C) plot of cathodic peak current  $i_{pc}$  vs square root of  $v$ . (D-E) Effect of concentration (5-40) μM of H<sub>2</sub>O<sub>2</sub> of GCE/CB@Chla and GCE/CB/Cytc in pH 7 PBS (N<sub>2</sub> purged) and (F) plot of  $|i_{pc}|$  vs [H<sub>2</sub>O<sub>2</sub>]/(μM) (baseline corrected).
